# Supplementary material
Source: PubMed Central journal article supplement (PMC7963619)
Supplement: 16-01065.pdf [file 16-01065.pdf]

## **ON-LINE APPENDIX: RESEARCH INVESTIGATORS FOR THE LIFE STUDY**

The Lifestyle Interventions and Independence for Elders Study is funded by a National Institutes of Health/National Institute on Aging Cooperative Agreement No. UO1 AG22376 and a supplement from the National Heart, Lung, and Blood Institute, 3U01AG022376-05A2S, and is sponsored, in part, by the Intramural Research Program, National Institute on Aging, National Institutes of Health.

The research is partially supported by the Claude D. Pepper Older Americans Independence Centers at the University of Florida (1 P30 AG028740), Wake Forest University (vz P30 AG21332), Tufts University (1P30AG031679), University of Pittsburgh (P30 AG024827), Yale University (P30AG021342), and the National Institutes of Health/National Center for Research Resources Clinical and Translational Science Awards at Stanford University (UL1 RR025744),

Tufts University is also supported by the Boston Rehabilitation Outcomes Center (1R24HD065688–01A1).

LIFE investigators are also partially supported by the following:

Dr Thomas Gill (Yale University) is the recipient of an Academic Leadership Award (K07AG3587) from the National Institute on Aging.

Dr Carlos Fragoso (Spirometry Reading Center, Yale University) is the recipient of a Career Development Award from the Department of Veterans Affairs.

Dr Roger Fielding (Tufts University) is partially supported by the US Department of Agriculture, under agreement No. 58-1950-0-014. Any opinions, findings, conclusions, or recommendations expressed in this publication are those of the authors and do not necessarily reflect the view of the US Department of Agriculture.

### **Administrative Coordinating Center, University of Florida, Gainesville, Florida**

Marco Pahor, MD, Principal Investigator of the LIFE Study  
Jack M. Guralnik, MD, PhD, Co-Investigator of the LIFE Study (University of Maryland School of Medicine, Baltimore, Maryland)  
Christiaan Leeuwenburgh, PhD  
Connie Caudle  
Lauren Crump, MPH  
Latonia Holmes  
Jocelyn Lee, PhD  
Ching-ju Lu, MPH

### **Data Management, Analysis, and Quality Control Center, Wake Forest University, Winston-Salem, North Carolina**

Michael E. Miller, PhD, Data Management, Analysis, and Quality Control Center Principal Investigator  
Mark A. Espeland, PhD, Data Management, Analysis, and Quality Control Center Co-Investigator  
Walter T. Ambrosius, PhD  
William Applegate, MD  
Daniel P. Beavers, PhD, MS  
Robert P. Byington, PhD, MPH, FAHA

Delilah Cook, CCRP  
Curt D. Furberg, MD, PhD  
Lea N. Harvin, BS  
Leora Henkin, MPH, MED  
John Hepler, MA  
Fang-Chi Hsu, PhD  
Laura Lovato, MS  
Wesley Roberson, BSBA  
Julia Rushing, BSPH, MStat  
Scott Rushing, BS  
Cynthia L. Stowe, MPM  
Michael P. Walkup, MS  
Don Hire, BS  
W. Jack Rejeski, PhD  
Jeffrey A. Katula, PhD, MA  
Peter H. Brubaker, PhD  
Shannon L. Mihalko, PhD  
Janine M. Jennings, PhD

### **National Institutes of Health, Bethesda, Maryland**

Evan C. Hadley, MD (National Institute on Aging)  
Sergei Romashkan, MD, PhD (National Institute on Aging)  
Kushang V. Patel, PhD (National Institute on Aging)

### **National Heart, Lung, and Blood Institute, Bethesda, Maryland**

Denise Bonds, MD, MPH

### **Field Center: Northwestern University, Chicago, Illinois**

Mary M. McDermott, MD, Field Center Principal Investigator  
Bonnie Spring, PhD, Field Center Co-Investigator  
Joshua Hauser, MD, Field Center Co-Investigator  
Diana Kerwin, MD, Field Center Co-Investigator  
Kathryn Domanchuk, BS  
Rex Graff, MS  
Alvito Rego, MA

### **Field Center: Pennington Biomedical Research Center, Baton Rouge, Louisiana**

Timothy S. Church, MD, PhD, MPH, Field Center Principal Investigator  
Steven N. Blair, PED (University of South Carolina)  
Valerie H. Myers, PhD  
Ron Monce, PA-C  
Nathan E. Britt, NP  
Melissa Nauta Harris, BS  
Ami Parks McGucken, MPA, BS  
Ruben Rodarte, MBA, MS, BS  
Heidi K. Millet, MPA, BS  
Catrine Tudor-Locke, PhD, FACSM  
Ben P. Butitta, BS  
Sheletta G. Donatto, MS, RD, LDN, CDE  
Shannon H. Cocreham, BS

### **Field Center: Stanford University, Palo Alto, California**

Abby C. King, PhD, Field Center Principal Investigator  
Cynthia M. Castro, PhD

William L. Haskell, PhD  
Randall S. Stafford, MD, PhD  
Leslie A. Pruitt, PhD  
Kathy Berra, MSN, NP-C, FAAN  
Veronica Yank, MD

**Field Center: Tufts University, Boston, Massachusetts**

Roger A. Fielding, PhD, Field Center Principal Investigator  
Miriam E. Nelson, PhD, Field Center Co-Investigator  
Sara C. Folta, PhD, Field Center Co-Investigator  
Edward M. Phillips, MD  
Christine K. Liu, MD  
Erica C. McDavitt, MS  
Kieran F. Reid, PhD, MPH  
Dylan R. Kirn, BS  
Evan P. Pasha, BS  
Won S. Kim, BS  
Vince E. Beard, BS  
Eleni X. Tsiroyannis, BS  
Cynthia Hau, BS, MPH

**Field Center: University of Florida, Gainesville, Florida**

Todd M. Manini, PhD, Field Center Principal Investigator  
Marco Pahor, MD, Field Center Co-Investigator  
Stephen D. Anton, PhD  
Susan Nayfield, MD  
Thomas W. Buford, PhD  
Michael Marsiske, PhD  
Bhanuprasad D. Sandesara, MD  
Jeffrey D. Knaggs, BS  
Megan S. Lorow, BS  
William C. Marena, MT, CCRC  
Irina Korytov, MD  
Holly L. Morris, MSN, RN, CCRC (Brooks Rehabilitation Clinical Research Center, Jacksonville, Florida)  
Margo Fitch, PT (Brooks Rehabilitation Clinical Research Center, Jacksonville, Florida)  
Floris F. Singletary, MS, CCC-SLP (Brooks Rehabilitation Clinical Research Center, Jacksonville, Florida)  
Jackie Causer, BSH, RN (Brooks Rehabilitation Clinical Research Center, Jacksonville, Florida)  
Katie A. Radcliff, MA (Brooks Rehabilitation Clinical Research Center, Jacksonville, Florida)

**Field Center: University of Pittsburgh, Pittsburgh, Pennsylvania**

Anne B. Newman, MD, MPH, Field Center Principal Investigator  
Stephanie A. Studenski, MD, MPH, Field Center Co-Investigator  
Bret H. Goodpaster, PhD  
Nancy W. Glynn, PhD  
Oscar Lopez, MD  
Neelesh K. Nadkarni, MD, PhD  
Kathy Williams, RN, BSEd, MHSA  
Mark A. Newman, PhD  
George Grove, MS  
Janet T. Bonk, MPH, RN

Jennifer Rush, MPH  
Piera Kost, BA (deceased)  
Diane G. Ives, MPH

**Field Center: Wake Forest University, Winston-Salem, North Carolina**

Stephen B. Kritchevsky, PhD, Field Center Principal Investigator  
Anthony P. Marsh, PhD, Field Center Co-Investigator  
Tina E. Brinkley, PhD  
Jamehl S. Demons, MD  
Kaycee M. Sink, MD, MAS  
Kimberly Kennedy, BA, CCRC  
Rachel Shertzer-Skinner, MA, CCRC  
Abbie Wrights, MS  
Rose Fries, RN, CCRC  
Deborah Barr, MA, RHEd, CHES

**Field Center: Yale University, New Haven, Connecticut**

Thomas M. Gill, MD, Field Center Principal Investigator  
Robert S. Axtell, PhD, FACSM, Field Center Co-Investigator  
(Southern Connecticut State University, Exercise Science Department)  
Susan S. Kashaf, MD, MPH (VA Connecticut Healthcare System)  
Nathalie de Rekeneire, MD, MS  
Joanne M. McGloin, MDiv, MS, MBA  
Karen C. Wu, RN  
Denise M. Shepard, RN, MBA  
Barbara Fennelly, MA, RN  
Lynne P. Iannone, MS, CCRP  
Raeleen Mautner, PhD  
Theresa Sweeney Barnett, MS, APRN  
Sean N. Halpin, MA  
Matthew J. Brennan, MA  
Julie A. Bugaj, MS  
Maria A. Zenoni, MS  
Bridget M. Mignosa, AS

**Field Center: Cognition Coordinating Center, Wake Forest University, Winston-Salem, North Carolina**

Jeff Williamson, MD, MHS, Center Principal Investigator  
Kaycee M Sink, MD, MAS, Center Co-Investigator  
Hugh C. Hendrie, MB, ChB, DSc (Indiana University)  
Stephen R. Rapp, PhD  
Joe Verghese, MB, BS (Albert Einstein College of Medicine of Yeshiva University)  
Nancy Woolard  
Mark Espeland, PhD  
Janine Jennings, PhD  
Valerie K. Wilson, MD

**Field Center: Electrocardiogram Reading Center, University of Florida, Gainesville, Florida**

Carl J. Pepine MD, MACC  
Mario Ariet, PhD  
Eileen Handberg, PhD, ARNP  
Daniel Deluca, BS

James Hill, MD, MS, FACC  
Anita Szady, MD

**Field Center: Spirometry Reading Center, Yale University,  
New Haven, Connecticut**

Geoffrey L. Chupp, MD  
Gail M. Flynn, RCP, CRFT  
Thomas M. Gill, MD

John L. Hankinson, PhD (Hankinson Consulting, Inc)  
Carlos A. Vaz Fragoso, MD

**Cost Effectiveness Analysis Center**

Erik J. Groessl, PhD (University of California, San Diego and VA  
San Diego Healthcare System)  
Robert M. Kaplan, PhD (Office of Behavioral and Social Sciences  
Research, National Institutes of Health)

**On-line Table: Inclusion/exclusion criteria for the LIFE MRI study**

| Inclusion                                                                                                                                                                                                                                                                                                                                                                                                                                                                                                 | Exclusion                                                                                                                                                                                                                                                                                               |
|-----------------------------------------------------------------------------------------------------------------------------------------------------------------------------------------------------------------------------------------------------------------------------------------------------------------------------------------------------------------------------------------------------------------------------------------------------------------------------------------------------------|---------------------------------------------------------------------------------------------------------------------------------------------------------------------------------------------------------------------------------------------------------------------------------------------------------|
| Parent study criteria<br>1) Age 70–89 years<br>2) Sedentary activity level: <20 minutes per week of regular physical activity in the past month and <125 minutes per week of moderate physical activity<br>3) High risk of mobility disability: $\leq 9$ on the Short Physical Performance Battery<br>4) Ability to walk 400 m in <15 minutes without sitting, leaning, or getting assistance<br>LIFE MRI-specific criteria<br>1) Willingness to complete an MRI scan at study baseline and after 2 years | 1) 3MS score $\geq 1.5$ SDs below education- and race-specific norms<br>2) Inability to safely participate in the intervention as determined by medical record review, physical exam, and electrocardiogram<br><br>1) Meeting any MRI exclusion criteria, including metal in the body or claustrophobia |

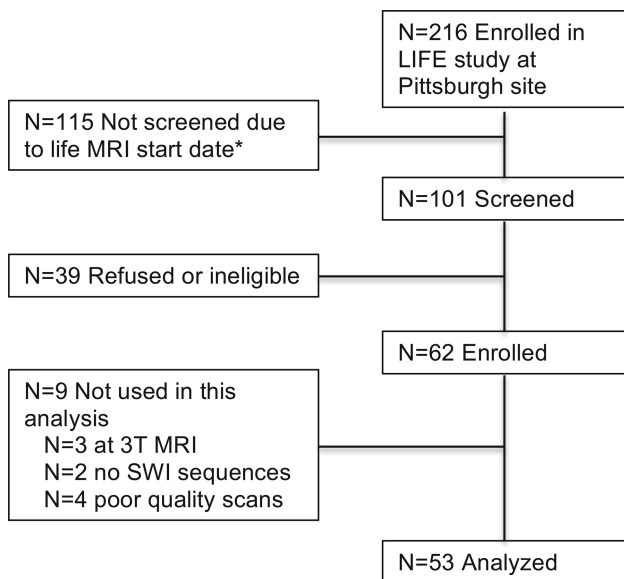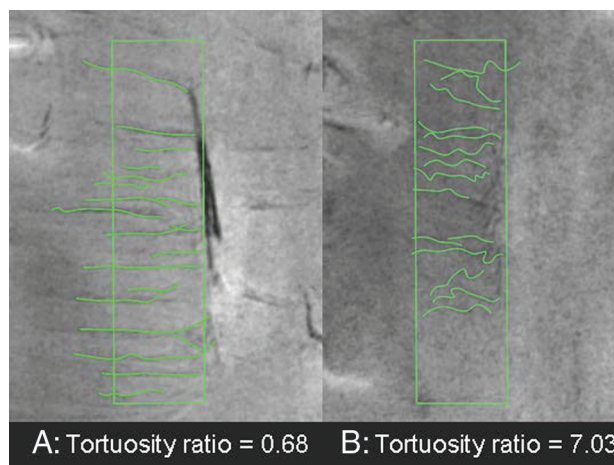

**ON-LINE FIG 3.** Sample right hemisphere ROIs of individuals with low (A) and high (B) tortuosity ratios.

**ON-LINE FIG 1.** LIFE MRI study flow at baseline. The LIFE study began in March 2010, and LIFE MRI began in December 2010.

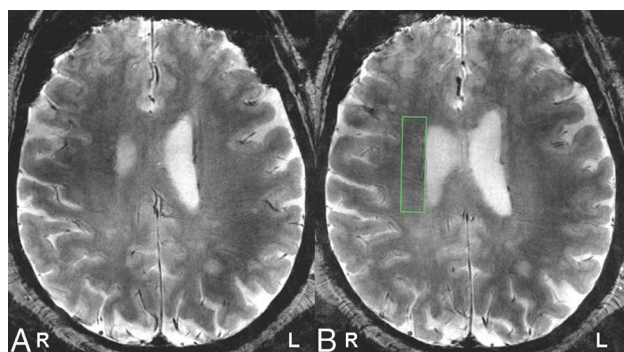

**ON-LINE FIG 2.** Sample ROI placement in the right hemisphere. A, The last section on which visible CSF is found. B, Then the 4 × 1 cm ROI (green box) is placed on the section where the ventricle is visible, 1 section below A. The minimum intensity projection is used over 3 sections (4.5 mm) to improve visualization of the continuity of low-intensity venous structures.
